# Supplementary material
Source: MDPI journal article supplement (https://www.mdpi.com/2077-0472/14/5/755)
Supplement: s1 [file s1]

Table S1. F-test statistics in ANOVA.

| Trait                                         | Y              | N              | S               | Y × N           | Y × S           | N × S           | Y × N × S       |
|-----------------------------------------------|----------------|----------------|-----------------|-----------------|-----------------|-----------------|-----------------|
| Plant height (cm)                             | 789.33**       | 4.41**         | 0.77 <i>ns</i>  | 2.20*           | 0.32 <i>ns</i>  | 1.02 <i>ns</i>  | 0.58 <i>ns</i>  |
| Stem-base diameter (mm)                       | 7.77**         | 0.52 <i>ns</i> | 0.04 <i>ns</i>  | 1.35 <i>ns</i>  | 0.24 <i>ns</i>  | 0.11 <i>ns</i>  | 0.17 <i>ns</i>  |
| Branches plant <sup>-1</sup>                  | 87.11**        | 3.66**         | 2.97 <i>ns</i>  | 1.28 <i>ns</i>  | 2.08 <i>ns</i>  | 1.61 <i>ns</i>  | 1.22 <i>ns</i>  |
| Plants m <sup>-2</sup>                        | 58.51**        | 1.46 <i>ns</i> | 1.10 <i>ns</i>  | 0.91 <i>ns</i>  | 0.23 <i>ns</i>  | 0.45 <i>ns</i>  | 0.96 <i>ns</i>  |
| Siliques plant <sup>-1</sup>                  | 222.80**       | 9.24**         | 3.68*           | 2.75**          | 1.50 <i>ns</i>  | 0.50 <i>ns</i>  | 0.79 <i>ns</i>  |
| Seeds silique <sup>-1</sup>                   | 22.36**        | 0.54 <i>ns</i> | 0.14 <i>ns</i>  | 1.05 <i>ns</i>  | 2.02 <i>ns</i>  | 1.50 <i>ns</i>  | 0.42 <i>ns</i>  |
| TSW (g)                                       | 374.21**       | 2.26 <i>ns</i> | 0.56 <i>ns</i>  | 1.88 <i>ns</i>  | 1.43 <i>ns</i>  | 1.30 <i>ns</i>  | 0.66 <i>ns</i>  |
| Seed yield (Mg ha <sup>-1</sup> )             | 371.45**       | 20.37**        | 3.67*           | 3.83**          | 2.92*           | 0.81 <i>ns</i>  | 0.68 <i>ns</i>  |
| NFUE (kg of seeds per 1 kg N)                 | 23.57**        | 6.95*          | 3.49*           | 3.32**          | 1.57 <i>ns</i>  | 1.01 <i>ns</i>  | 0.49 <i>ns</i>  |
| Straw yield (Mg ha <sup>-1</sup> )            | 73.85**        | 4.41**         | 0.09 <i>ns</i>  | 0.53 <i>ns</i>  | 0.79 <i>ns</i>  | 1.69 <i>ns</i>  | 1.63 <i>ns</i>  |
| Harvest index (%)                             | 19.46**        | 3.85**         | 0.12 <i>ns</i>  | 1.05 <i>ns</i>  | 1.09 <i>ns</i>  | 0.86 <i>ns</i>  | 0.76 <i>ns</i>  |
| Crude fat content (g kg <sup>-1</sup> DM)     | 0.00 <i>ns</i> | 25.92**        | 11.68**         | 2.78**          | 1.58 <i>ns</i>  | 0.88 <i>ns</i>  | 1.43 <i>ns</i>  |
| C <sub>16</sub> (%)                           | 104.08**       | 2.50*          | 0.71 <i>ns</i>  | 1.67 <i>ns</i>  | 0.82 <i>ns</i>  | 0.64 <i>ns</i>  | 0.53 <i>ns</i>  |
| C <sub>18</sub> (%)                           | 17.15**        | 4.40**         | 1.12 <i>ns</i>  | 0.53 <i>ns</i>  | 0.87 <i>ns</i>  | 0.29 <i>ns</i>  | 0.82 <i>ns</i>  |
| C <sub>18:1</sub> (%)                         | 49.17**        | 4.28**         | 1.18 <i>ns</i>  | 1.73 <i>ns</i>  | 0.64 <i>ns</i>  | 0.52 <i>ns</i>  | 0.50 <i>ns</i>  |
| C <sub>18:2</sub> (%)                         | 21.51**        | 0.25 <i>ns</i> | 0.32 <i>ns</i>  | 0.25 <i>ns</i>  | 0.81 <i>ns</i>  | 0.18 <i>ns</i>  | 1.70 <i>ns</i>  |
| C <sub>18:3</sub> (%)                         | 15.78**        | 7.47**         | 4.61*           | 2.04 <i>ns</i>  | 0.44 <i>ns</i>  | 0.97 <i>ns</i>  | 1.21 <i>ns</i>  |
| C <sub>20:1</sub> (%)                         | 29088.35**     | 5.24**         | 0.15 <i>ns</i>  | 1.62 <i>ns</i>  | 1.21 <i>ns</i>  | 0.28 <i>ns</i>  | 1.68 <i>ns</i>  |
| C <sub>22:1</sub> (%)                         | 54.37**        | 4.38**         | 1.46 <i>ns</i>  | 0.85 <i>ns</i>  | 0.47 <i>ns</i>  | 0.29 <i>ns</i>  | 1.03 <i>ns</i>  |
| SFAs (%)                                      | 37.30**        | 4.29**         | 1.33 <i>ns</i>  | 0.83 <i>ns</i>  | 1.89 <i>ns</i>  | 0.61 <i>ns</i>  | 1.50 <i>ns</i>  |
| MUFAs (%)                                     | 17.41**        | 1.27 <i>ns</i> | 4.29*           | 0.58 <i>ns</i>  | 0.47 <i>ns</i>  | 0.91 <i>ns</i>  | 1.44 <i>ns</i>  |
| PUFAs (%)                                     | 7.35**         | 6.51**         | 4.55*           | 0.93 <i>ns</i>  | 1.84 <i>ns</i>  | 0.25 <i>ns</i>  | 1.52 <i>na</i>  |
| Total protein content (g kg <sup>-1</sup> DM) | 7.91**         | 17.25**        | 1.63 <i>ns</i>  | 1.06 <i>ns</i>  | 0.75 <i>ns</i>  | 1.19 <i>ns</i>  | 1.24 <i>ns</i>  |
| Crude fiber content (g kg <sup>-1</sup> DM)   | 3.956*         | 11.258**       | 1.383 <i>ns</i> | 1.795 <i>ns</i> | 0.552 <i>ns</i> | 1.015 <i>ns</i> | 1.156 <i>ns</i> |
| NDF (%)                                       | 21.11**        | 3.45*          | 1.31 <i>ns</i>  | 1.72 <i>ns</i>  | 1.50 <i>ns</i>  | 1.17 <i>ns</i>  | 1.57 <i>ns</i>  |
| ADF (%)                                       | 13.94**        | 0.50 <i>ns</i> | 1.01 <i>ns</i>  | 1.85 <i>ns</i>  | 1.25 <i>ns</i>  | 0.20 <i>ns</i>  | 0.48 <i>ns</i>  |
| α-tocopherol (mg 100 g <sup>-1</sup> DM)      | 159.77**       | 5.44**         | 3.20*           | 1.93 <i>ns</i>  | 0.37 <i>ns</i>  | 0.25 <i>ns</i>  | 0.30 <i>ns</i>  |
| β- tocopherol (mg 100 g <sup>-1</sup> DM)     | 74.43**        | 12.76**        | 1.54 <i>ns</i>  | 1.74 <i>ns</i>  | 1.04 <i>ns</i>  | 0.45 <i>ns</i>  | 0.42 <i>ns</i>  |
| γ- tocopherol (mg 100 g <sup>-1</sup> DM)     | 0.04 <i>ns</i> | 10.28**        | 15.61**         | 0.22 <i>ns</i>  | 2.96*           | 0.80 <i>ns</i>  | 0.49 <i>ns</i>  |
| δ- tocopherol (mg 100 g <sup>-1</sup> DM)     | 19.15**        | 1.47 <i>ns</i> | 0.99 <i>ns</i>  | 1.68 <i>ns</i>  | 0.10 <i>ns</i>  | 1.41 <i>ns</i>  | 0.49 <i>ns</i>  |
| Σ tocopherols (mg 100 g <sup>-1</sup> DM)     | 3.26*          | 13.73**        | 16.024**        | 0.17 <i>ns</i>  | 2.37 <i>ns</i>  | 0.85 <i>ns</i>  | 0.47 <i>ns</i>  |

\*significant  $p \leq 0.05$ ; \*\*significant  $p \leq 0.01$ ; *ns* – not significant; Y- growing season; N – nitrogen fertilization; S – sulfur fertilization; TSW - 1000-seed weight; NFUE - nitrogen fertilizer use efficiency; C<sub>16</sub> – palmitic acid; C<sub>18</sub> – stearic acid; C<sub>18:1</sub> – oleic acid; C<sub>18:2</sub> – linoleic acid; C<sub>18:3</sub> – linolenic acid; C<sub>20:1</sub> – eicosanoic acid; C<sub>22:1</sub> – erucic acid; SFAs - saturated fatty acids; MUFAs - monounsaturated fatty acids; PUFAs - polyunsaturated fatty acids; ADF - acid detergent fiber; NDF - neutral detergent fiber.
